# Supplementary material for: Improved Bacterial 16S rRNA Gene (V4 and V4-5) and Fungal Internal Transcribed Spacer Marker Gene Primers for Microbial Community Surveys
Source: PubMed Central journal article supplement (PMC5069754; doi:10.1128/msystems.00009-15), 2015-12-22

**A**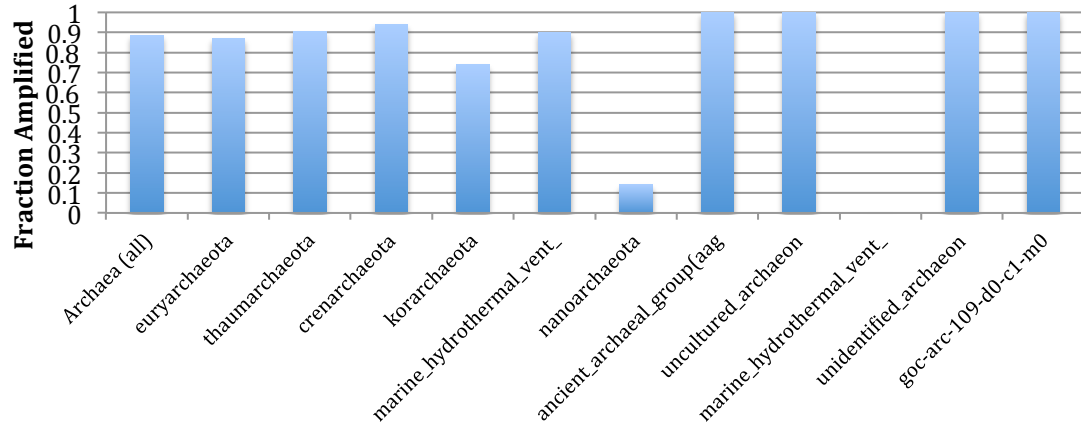**B**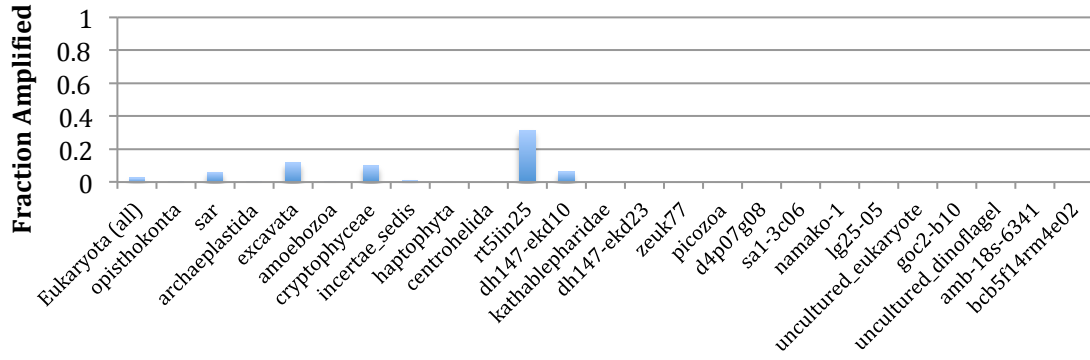

### Fraction Amplified

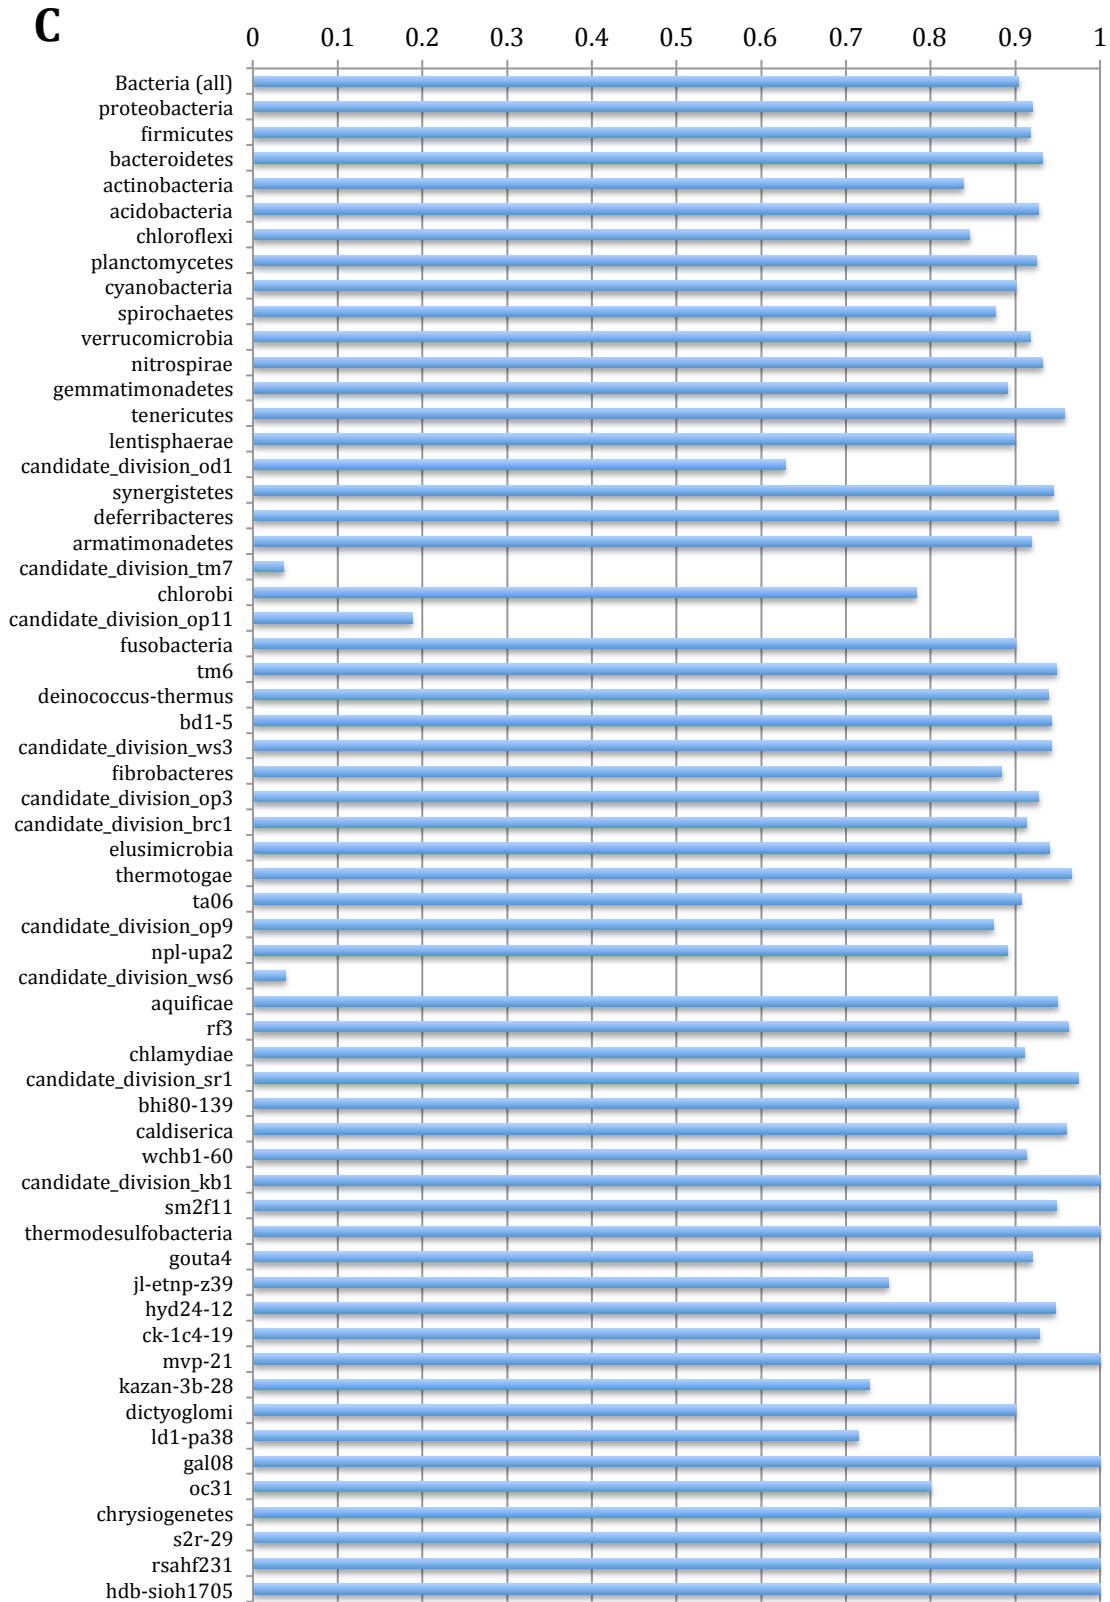

**D**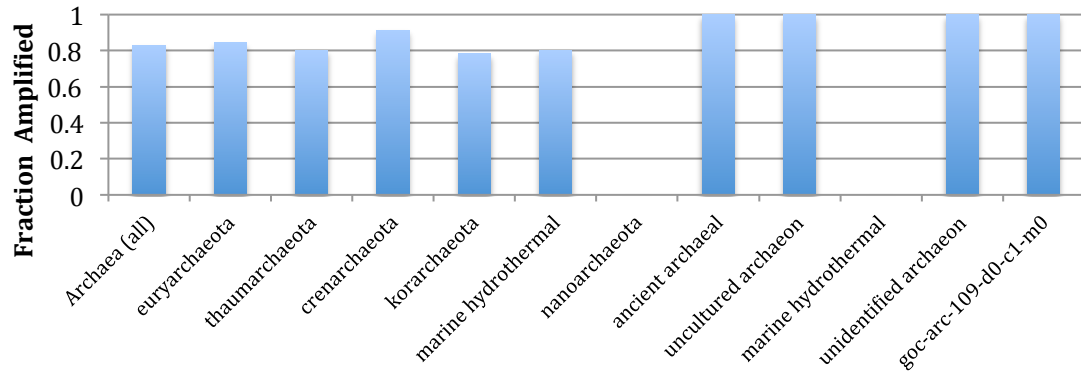**E**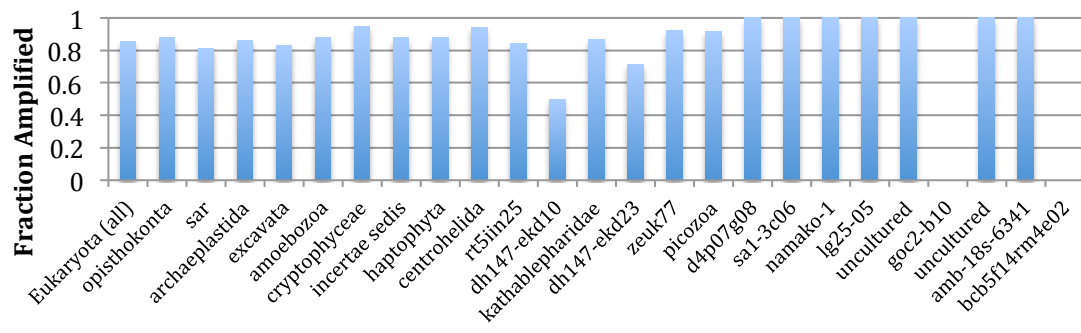

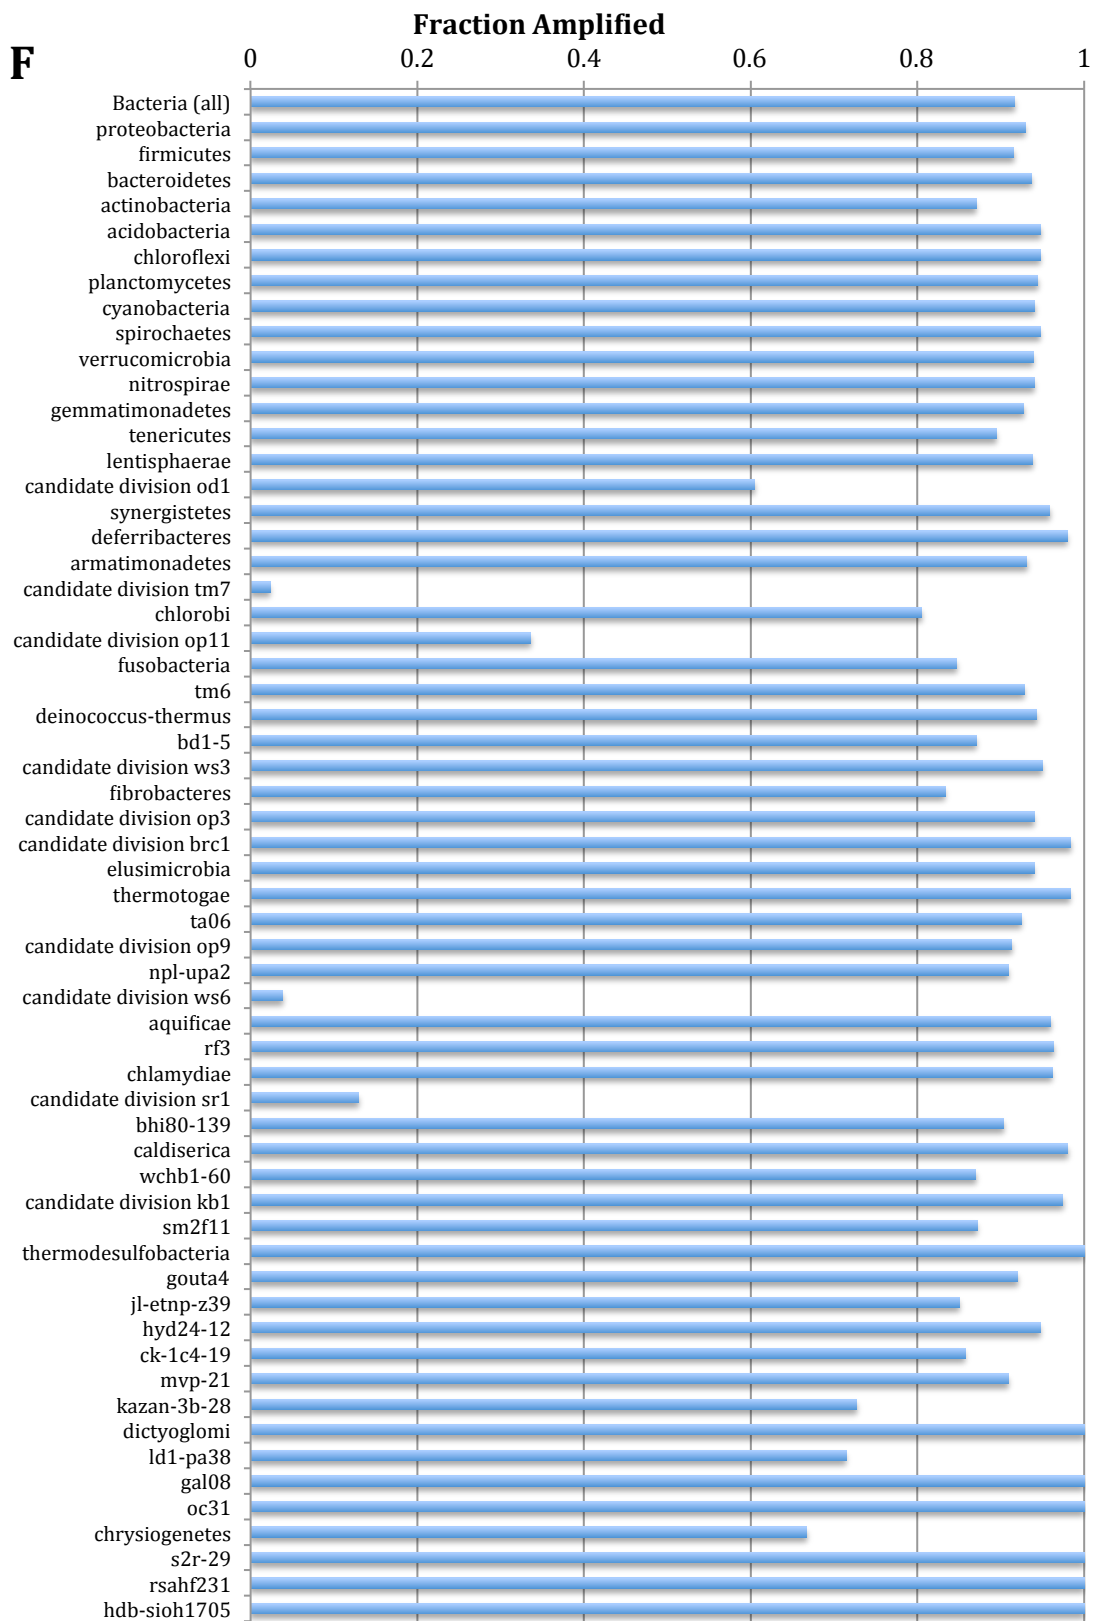

Supplement: sys001160029sf5.pdf [file sys001160029sf5.pdf]
